# Supplementary material
Source: PubMed Central journal article supplement (PMC2898500)
Supplement: gzq033_1.pdf [file gzq033_1.pdf]

# Design and Directed Evolution of a Dideoxy Purine Nucleoside Phosphorylase

## Supplementary Figures & Tables

David P. Nannemann, Kristian W. Kaufmann, Jens Meiler\* and Brian O. Bachmann\*

Department of Chemistry, Vanderbilt University, Nashville, TN 37235, USA

Corresponding Author: [brian.bachmann@vanderbilt.edu](mailto:brian.bachmann@vanderbilt.edu)

**Table S1.** Predicted Binding Energies for hPNP-Y88X variants

| Variant   | Experimental Binding Energy (kJ/mol) <sup>a</sup> |                  | Predicted Binding Energy (REU) <sup>b</sup> |       | Predicted Binding Energy (kJ/mol) <sup>c</sup> |                  |
|-----------|---------------------------------------------------|------------------|---------------------------------------------|-------|------------------------------------------------|------------------|
|           | Inosine                                           | ddI              | Inosine                                     | ddI   | Inosine                                        | ddI              |
| Wild-type | -34.0                                             | -16.8            | -7.73                                       | -7.78 | -19.82                                         | -23.39           |
| Y88F      | -31.9                                             | -24.9            | -7.24                                       | -8.46 | -29.70                                         | -21.75           |
| Y88H      | -28.9                                             | -20.3            | -6.71                                       | -7.39 | -25.67                                         | -14.08           |
| Y88W      | -23.1                                             | -11.2            | -5.86                                       | -6.66 | -20.40                                         | -18.48           |
| Y88A      | -30.5                                             | -18.4            | -4.76                                       | -5.78 | -22.44                                         | -13.28           |
| Y88V      | -18.8                                             | -12.3            | -7.01                                       | -7.31 | -25.84                                         | -16.30           |
| Y88L      | -29.8                                             | -23.9            | -7.12                                       | -7.91 | -27.03                                         | -15.61           |
| Y88I      | -17.0                                             | -11.8            | -5.06                                       | -6.83 | -21.27                                         | -13.03           |
| Y88M      | -26.1                                             | -22.3            | -7.57                                       | -8.09 | -30.77                                         | -22.41           |
| Y88C      | -25.7                                             | -19.9            | -5.15                                       | -5.85 | -21.81                                         | -9.66            |
| Y88S      | -24.6                                             | -16.1            | -6.72                                       | -7.44 | -27.00                                         | -12.24           |
| Y88T      | -18.8                                             | -9.4             | -6.62                                       | -7.1  | -16.60                                         | -4.15            |
| Y88N      | -23.2                                             | -12.5            | -6.46                                       | -6.9  | -19.99                                         | -13.52           |
| Y88Q      | -18.4                                             | -12.8            | -5.75                                       | -6.64 | -25.41                                         | -16.50           |
| Y88D      | -14.1                                             | -1.5             | -7.78                                       | -8.73 | -20.92                                         | -11.37           |
| Y88E      | -12.3                                             | 0.3              | -8.13                                       | -8.93 | -19.12                                         | -12.13           |
| Y88K      | n/d <sup>d</sup>                                  | n/d <sup>d</sup> | -9.01                                       | -9.14 | n/d <sup>d</sup>                               | n/d <sup>d</sup> |
| Y88R      | -7.21                                             | n/d <sup>d</sup> | -7.66                                       | -7.26 | n/d <sup>d</sup>                               | n/d <sup>d</sup> |

a. Experimental binding energy,  $\Delta G_{TS}^\ddagger = -RT \ln(k_{cat}/K_M)$

b. Binding energies established using the Protein:Ligand weightset.

c. Binding energies established using the PNP:Nucleoside customized weightset.

d. Values for lysine and arginine mutants were not determined with the reweighted scoring function nor plotted in Fig. 3 of the main text as kinetic data was incomplete for these mutants.

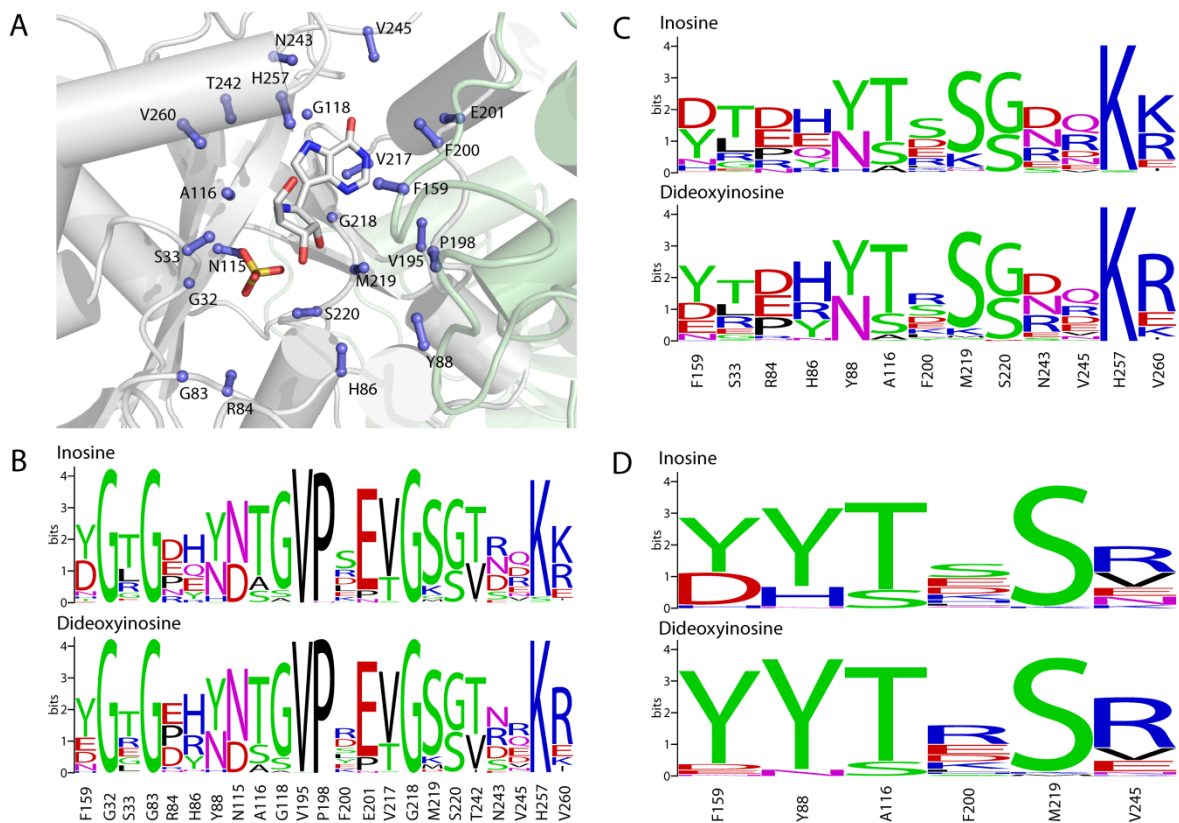

**Fig. S1.**  $C\alpha$  and  $C\beta$  atoms are shown as balls and sticks for residues allowed to design while identifying amino acids involved in substrate selectivity (A). ImmucilinH and sulfate are depicted as sticks (PDB code: 1pf7). 23 residues were designed during the first round (B), 13 during the second round (C) and 6 during the third round (D). Images were generated using the WebLogo server (Crooks *et al.*, 2004) and indicate the frequency of each amino acid at each position with information content plotted on the y-axis.

## References

Crooks G.E., Hon G., Chandonia J.M. and Brenner S.E. (2004) *Genome Res*, **14**, 1188-1190.
